# Supplementary material
Source: PubMed Central journal article supplement (PMC2951471)

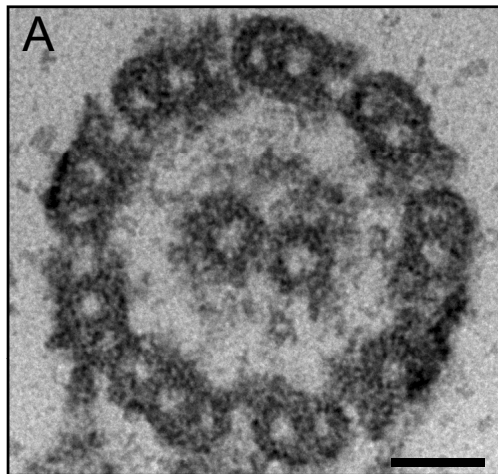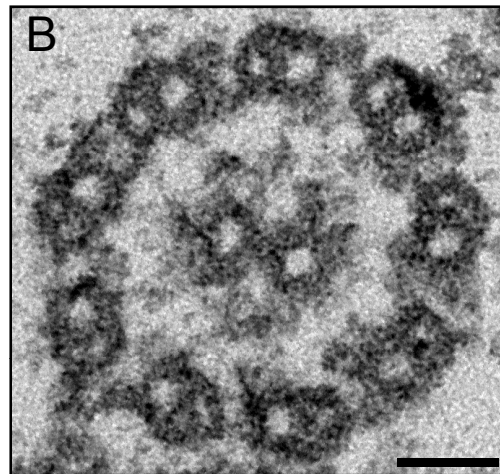

Supplement: supp_123_20_3587__1.pdf [file supp_123_20_3587__1.pdf]
